# Supplementary material for: Morpho-chemical characterization of individual ancient starches retrieved on ground stone tools from Palaeolithic sites in the Pontic steppe
Source: Springer Nature journal article supplement (doi:10.1038/s41598-023-46970-8), 2023-12-07
Supplement: MOESM1 [file 41598_2023_46970_MOESM1_ESM%20.pdf]

## Supplementary Materials

### Morpho-chemical characterization of individual ancient starches retrieved on ground stone tools from Palaeolithic sites in the Pontic steppe

G. Birarda<sup>1\*</sup>, E. Badetti<sup>2\*</sup>, C. Cagnato<sup>3,4\*</sup>, G. Sorrentino<sup>5\*</sup>, I. Pantyukhina<sup>6</sup>, C. Stani<sup>7</sup>, S. Dal Zilio<sup>8</sup>, G. Khlopachev<sup>9</sup>, S. Covalenco<sup>10</sup>, T. Obada<sup>11</sup>, N. Skakun<sup>12</sup>, A. Sinitsyn<sup>12</sup>, V. Terekhina<sup>9,12</sup>, A. Marcomini<sup>2</sup>, C. Lubritto<sup>13</sup>, N. Cefarin<sup>1</sup>, L. Vaccari<sup>1\*</sup>, L. Longo<sup>2,14\*</sup>

#### *Affiliations*

<sup>1</sup> Elettra-Sincrotrone Trieste, S.S. 14 - km 163,5 in AREA Science Park, 34149 Basovizza, Trieste Italy;

<sup>2</sup> Ca' Foscari University of Venice, Department of Environmental Sciences, Informatics and Statistics, via Torino 155, 30172 Mestre (VE), Italy;

<sup>3</sup> UMR 8096 Archéologie des Amériques; CNRS-Université Paris 1 - Panthéon-Sorbonne, France;

<sup>4</sup> UMR7268 Anthropologie bio-culturelle, Droit, Ethique et Santé (ADES) Marseille, France;

<sup>5</sup> Department of Physics, University of Turin, Italy;

<sup>6</sup> Institute of History, Archaeology and Ethnology, Far-Eastern Branch, IHAE-FEB RAS Vladivostok, Russia;

<sup>7</sup> CERIC-ERIC, S.S. 14 - km 163,5 in AREA Science Park, 34149 Basovizza, Trieste Italy;

<sup>8</sup> CNR IOM, S.S. 14 - km 163,5 in AREA Science Park, 34149 Basovizza, Trieste Italy;

<sup>9</sup> Peter the Great Museum of Anthropology and Ethnography (the Kunstkamera) of the Russian Academy of Science, St. Petersburg, Russia;

<sup>10</sup> Institute of Cultural Heritage, Academy of Sciences of Moldova, Moldova;

<sup>11</sup> Institute of Zoology, National Museum of Ethnography and Natural History of Moldova, Moldova;

<sup>12</sup> Institute for the History of Material Culture, IHMC-RAS St. Petersburg, Russia;

<sup>13</sup> Department of Environmental, Biological and Pharmaceutical Sciences and Technologies, University of Caserta "Luigi Vanvitelli", Via Vivaldi 43, 81100 Caserta, Italy;

<sup>14</sup> ADM School, Nanyang Technological University, Singapore

<sup>1\*</sup> giovanni.birarda@elettra.eu

<sup>2,14\*</sup> laura.longo@unive.it

L. Longo and G. Birarda provided the Supplementary Online Materials

G. Sorrentino edited Supplementary Fig. 1.

|    |                                                           |
|----|-----------------------------------------------------------|
| 42 | <b>Index</b>                                              |
| 43 | <b>1. The geographical context of the research</b>        |
| 44 | <b>2. Archaeological sites</b>                            |
| 45 | <b>2.1 Brînzei I (Moldova)</b>                            |
| 46 | <i>2.1.1 Brînzei I: object's biography</i>                |
| 47 | <b>2.2 Surein I (Crimea)</b>                              |
| 48 | <i>2.2.1 Surein I: object's biography</i>                 |
| 49 | <b>2.3 Kostenki 14-Markina Gora (Russia)</b>              |
| 50 | <i>2.3.1 Kostenki 14-Markina Gora: object's biography</i> |
| 51 | <b>3. Sample preparation</b>                              |
| 52 | <b>4. Spectra subtraction</b>                             |
| 53 |                                                           |
| 54 |                                                           |
| 55 |                                                           |

56

## 1. The geographical context of the research

57

58

59

60

61

62

63

64

65

66

67

68

69

70

71

72

73

Ancient starch candidates (ASCs) have been retrieved from stone tools used to grind and pound starch-rich organs by humans who lived across the Pontic steppe starting around 40 ka BP. The Pontic steppe covers the southwestern part of the Eurasian Steppe Belt, a very wide east-west plain crossed by a mosaic of river valleys from the Dnieper to the Volga Rivers expanding eastwards towards the Anuy River (Siberia), and by high plateaus from the Carpathians to the Urals until the Altai Mountains (Central Siberia). Since antiquity, the Pontic Steppe has been known as the *Pontus Euxinus* (Euxeinos Pontos), and covers the Mediterranean coastal areas overlooking the Black Sea and the Caspian Sea (Supplementary Fig. 1). It is a territory rich in caves and shelters, good quality raw materials, and it has plenty of animal herds; it also functioned as an open nexus between the northern and southern boreal territories. This biome is a rich steppe-like grassland dominated by shrubs (including large graminoids) with spots of forest-steppe and this biotic diversity provided a wide range of starch-rich plants throughout the year<sup>1</sup>. The area sets the scene for one of the dispersal routes into Western Eurasia by *Homo sapiens*, who most probably crossed paths and mated with local groups of late Neanderthals, still surviving in the southern refugia<sup>2-4</sup>. It is possible that small, mobile groups of hunter-gatherers strategically foraged on a broad spectrum of resources that includes starchy plants available in the rich biome of the Pontic steppe during the MIS 3.<sup>5,6</sup> Within the periglacial loess-steppe environment of the East European Plain, the analyses are centered on the structured use-related biogenic residues (SU-RBR) dislodged from ground stone tools (GSTs) retrieved from 3 sites: Kostenki 14 – Markina Gora, Brînzeni I cave, and Surein I rockshelter (Supplementary Fig. 1).

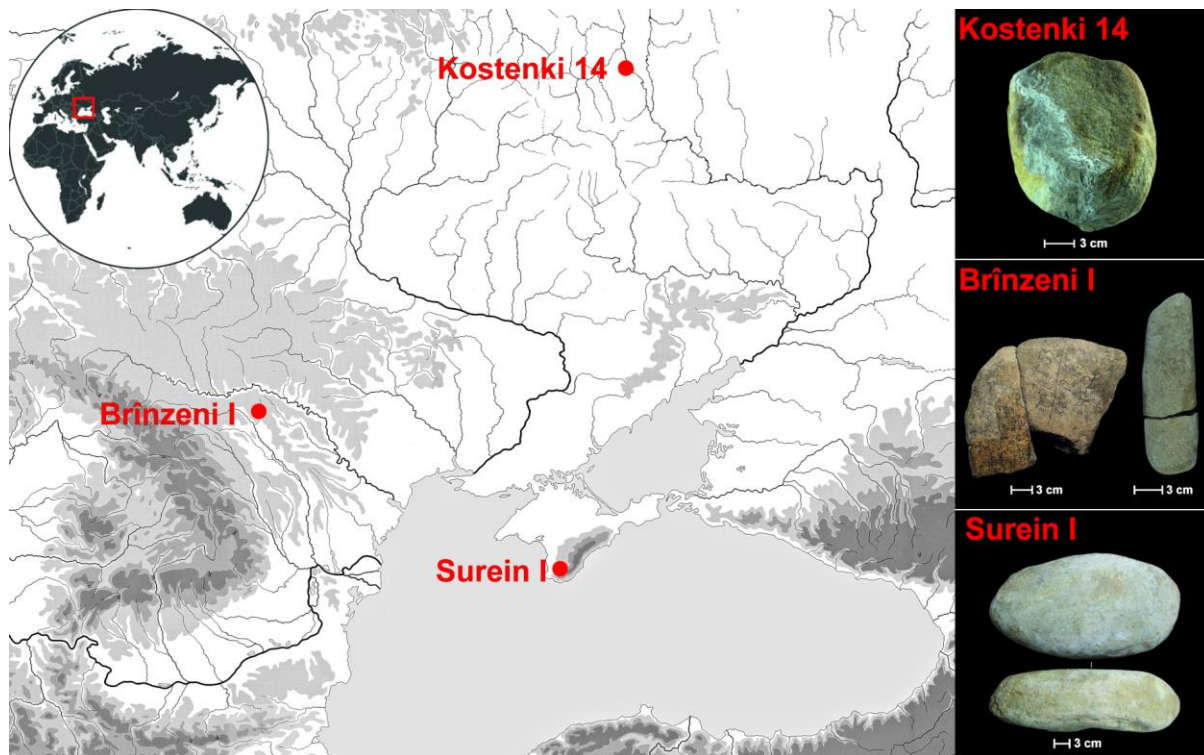

74

**Supplementary Fig. 1.** Location of Kostenki 14 – Markina Gora, Brînzeni I, and Surein I sites across the Pontic steppe, on the northern rim of the Black Sea. On the right, examples of the GSTs involved in this study: one small grinding stone from Kostenki 14 - Markina-Gora, the fragmented pestle and grinding stone from Brînzeni I, and the large grinding stone from Surein I.

79

## 2. Archaeological sites

80

81

### 2.1 Brînzeni I

82 The cave opens on the Racovăț River, a tributary of the Prut River, in the Edinet district, north-western Moldova.  
83 The Prut River area was one of the most densely occupied areas during the Upper Paleolithic - 32 and 27 ka uncal  
84 BP (36,000 and 30,000 years ago) - west of the Carpathians<sup>7</sup>. The Brînzeni cave, 17 x 14 x 4 m (maximum height)  
85 lays at 65 m asl and its mouth is oriented towards the north. Near the site, the Miocene limestone outcrops are rich  
86 in high quality flint, possibly one of the reasons for the successful presence of modern humans in the territory  
87 during the crucial time for the early colonization of south-eastern Europe.

88 The site is recorded as yielding one of the most relevant Upper Paleolithic assemblages within the so-called “Prut  
89 River Culture”<sup>5</sup>. Its rich lowermost “cultural layer III” has been attributed to Aurignacian<sup>7</sup>, therefore representing  
90 an early presence of *Homo sapiens* in the area (as supported by 3 recent AMS radiocarbon dating on bone collagen  
91 - Beta 462731, Beta 462732, Beta 462733 - carried out by the authors in 2017, unpublished data). The site was  
92 discovered by N.A. Chetaru – who systematically excavated the settlement over several campaigns (1963-65,  
93 1968 and 1975 and by I.A. Borziak in 1987) – and yielded extraordinary art works, among which is worth  
94 mentioning the ivory pendant or amulet (a definition that N. A. Chetaru preferred, 2006 personal communication)  
95 retrieved in the inner part of the cave, near the bottom of cultural layer III.

96 The area of the Prut River underwent severe climatic downturns during MIS 3 and the periglacial/steppe conditions  
97 supported by pollen analysis match with the occurrence of horse, reindeer, and bison, the large herbivores most  
98 targeted by Brînzeni I dwellers. Regarding the vegetal covering, trees are represented by *Pinus sylvestris*, *Betula*,  
99 *Ulmus*, *Tilia*, *Corylus* and *Picea*, with the presence of Poaceae, Chenopodiaceae, and Asteraceae, including  
100 *Artemisia*<sup>7</sup>. In 1987 S.I. Medyanic collected samples from different stratigraphic layers, for pollen and spore  
101 analysis. The study reveals the absence of arctic-alpine and boreal elements and the presence of taxa compatible  
102 with wooded steppe surrounding the site. The pollen list available for Brinzeni I guided which plants to include in  
103 reference collection. Among the reported species we analyzed starch grains from taxa within different families:  
104 Alismataceae (water-plantains, *Sagittaria sagittifolia*), Brassicaceae (*Brassica oleracea*), Cupressaceae  
105 (*Juniperus* sp.), Cyperaceae (*Carex* sp. and *Cyperus esculentus*), Fabaceae (*Pueraria lobata*), Liliaceae  
106 (*Erythronium dens-canis*), Poaceae (*Panicum miliaceum*), Polygonaceae (*Polygonum aviculare*, *Fagopyrum* sp.),  
107 Sapindaceae (*Aesculus hippocastanum*), Typhaceae (*Typha angustifolia*). All reported plants include taxa with  
108 starch-rich storage organs (cambium for trees, nuts, rhizomes and seeds for grasses).

109 **2.2.1 Brînzeni I Object’s biography.** Among the 114 pebble stones collected during the excavations, 36 were  
110 selected as putative ground stone tools and are currently under analysis from morphological, traceological, and  
111 residual perspectives. On the basis of their petrographic analysis, the stones can be attributed mainly to calcarenite  
112 and quartz-arenite, most likely collected from the Racovăț River that flows below the cave.<sup>8</sup> We here report on the  
113 structured use-related biogenic residues (SU-RBR, see main text for definition) retrieved on five of the sampled  
114 GSTs: a pestle broken into two pieces, BZ #833 and BZ #2965; a reconstructed grinding stone (a lower base, still  
115 incomplete) composed of two fragments BZ #442 and BZ #NN (No Number); another large grinding stone, BZ  
116 #6707 and a smaller one BZ #3539, and a broken pestle BZ #177. Regarding the object biography<sup>5,6,9</sup> the following  
117 information can be relevant to frame the research questions and to parsimoniously interpret the results of the  
118 analyses. According to Chetaru’s field notebooks available in the museum collections, the investigated ground  
119 stones were mapped on the site plan/grid during the excavation, roughly washed in the river near the site, and ink  
120 labeled; after these preliminary procedures they were stored in wooden boxes that are enclosed in metal cages and  
121 kept in the storage facilities of the National Museum of History of Moldova (NMHM, Chisinau, Moldova), where  
122 they were accessed by the authors in 2015 and 2016, under an overall research agreement between Nanyang  
123 Technological University, NTU, Singapore, and NMHM. The fact that many of the retrieved pebbles bear large  
124 aggregates of residual sediment, as well as some fragments of carbonate crusts adhering to the surfaces, supports  
125 the notion their handling was very limited before our visit. Moreover, two GSTs, namely a long pestle and a large  
126 grinding stone, were refit thanks to our analysis, in turn suggesting that the non-flaked assemblage was not handled  
127 prior to our study.

128 During the sampling campaigns, the stones were preliminary inspected with a stereomicroscope and a  
129 metallographic microscope (Olympus BHMJ metallographic microscope).<sup>5,6</sup> Hence, putative used areas were  
130 identified by the damage patterns observed and then sampled for further analysis. A sketch of the flowchart  
131 describing the GSTs cleaning and U-RBRs retrieval is presented in Supplementary Figure 5. Two different  
132 strategies were followed for residue extraction from the identified used areas. The active areas of a first group of  
133 GSTs (2016 campaign, #442, #NN, #833, #2965, #177) were sonicated, immersing the relevant areas in 100-200  
134 ml of MQ® water and placed in an ultrasonic bath at the Chemistry Department of the State University of Moldova  
135 (Chişinău). The suspension obtained was centrifuged two times at 6000 rpm and the supernatant discarded in order  
136 to reduce the volume, transferred into 2 mL vials, where a few drops of Ethanol were added (Longo et al. 2021<sup>5</sup>,  
137 Fig. 3). During the successive campaign (2017) other stones were processed and here we present the analysis of  
138 #3539, #6707, two large grinding stones (passive tools). The active area of each stone was soaked in ultrapure  
139 water for 2 hours by keeping the beaker covered to avoid being contaminated. In this case neither the sonic bath  
140 nor the centrifuge were available. The solution was poured in two 50 ml tubes and a few drops of ethanol was  
141 added. The solution was then centrifuged at NTU lab facilities in Singapore and the obtained pellet was sent to the  
142 labs of the Institute of History, Archaeology and Ethnology, Far-Eastern Branch, IHAE-FEB RAS Vladivostok,  
143 Russia (2017) and UMR 8096 Archéologie des Amériques in Paris (2018) for the further extraction of the starch  
144 (procedure detailed in the main text and in Longo et al. 2021, 2022).<sup>5,6</sup> To perform morphometric evaluation, the  
145 stones were 3D scanned using the Artec3D Space Spider light scanner, while molds were obtained from both  
146 putative used and unused surfaces for comparative use-wear traces analysis<sup>5,6,10</sup>. Detailed functional analysis (G.S.  
147 PhD thesis) supports the intentional use of the GSTs in multiple sequential and contemporary utilization to process  
148 different materials, which includes ochre and starch-rich plant organs: USO and ASO<sup>5,6,10</sup> (example of traces  
149 observed under 3D digital microscope Hirox KH-8700 accessed at the Cyprus Institute (2016-2017) are presented  
150 in Figure 2). Moreover, the areas with the carbonate crust still covering zones of some GSTs were also sampled  
151 for starch grains by carefully removing said crust using each time a clean scalpel, and the area underneath was  
152 then sonicated or soaked in carbonated water to dislodge the putative remains. The area was finally molded for  
153 surface texture analysis. Finally, control samples were taken by pipetting small amounts of deionized water from  
154 the inner surface of the wooden boxes containing the stone tools. As previously detailed in Longo et al. 2022,<sup>6</sup>  
155 these wooden boxes were themselves encased in sealed metal boxes located on museum shelves. From the control  
156 samples, no starch grains were retrieved.

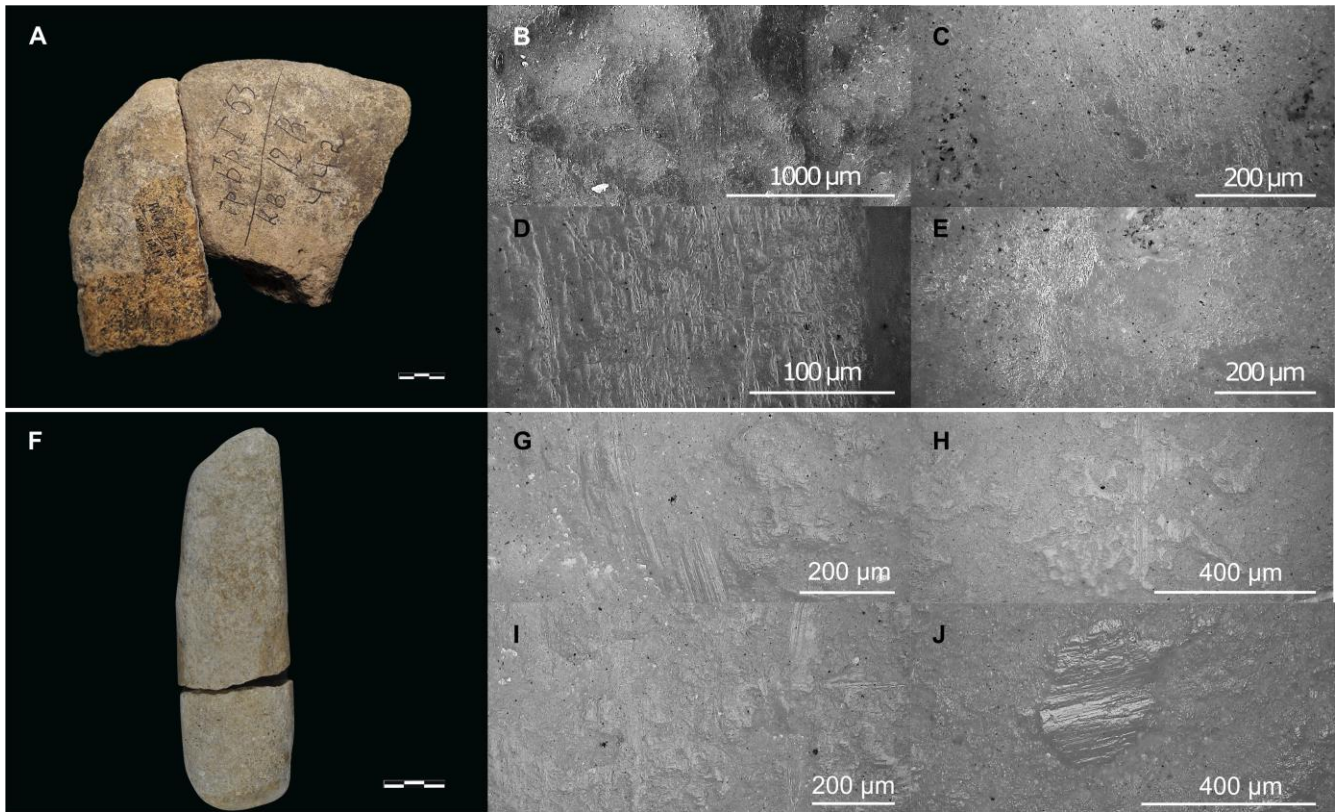

157

158 **Supplementary Fig. 2.** Brînzani I, both a grinding stone (A) and a pestle (B) were refitted during the present study, intended  
 159 as a good indicator that the stones remained untouched after their abandonment; in a second instance, the present refitting  
 160 suggests that no attention by previous studies – devoted to the flaked industry – was paid to the macrolithic tool assemblage,  
 161 leaving the pebbles almost untouched for further studies. Use-wear traces observed on the active surfaces of the GSTs as  
 162 observed with Hirox 8700, using mid-range zoom lens with large depth-of-field and long working distance. A selection of  
 163 different features affecting the stone’s working surface: polish (B-C, E, H) and striations (D-G, I-J).

## 164 2.2 Surein I

165 On the eastern slope of the Bel’bek gorge (Crimea Peninsula, near Sebastopol), the large rock shelter of Surein I  
 166 (43 x 15 x 10 m) overlooks the second ridge of the Crimean Mountains at 110 m asl. Among the best-known  
 167 Palaeolithic sites of Crimea, Surein I was first tested by K.S. Merezhkovski (alias Merejkowski) in 1879-1880 and  
 168 then excavated between 1926-1929 by G. Bonch-Osmolovski, a renowned archaeologist who, in the same years,  
 169 discovered the site of Kiik-Koba, the first site yielding Neanderthal remains in Crimea. Bonch-Osmolovski was  
 170 also a highly skilled museum curator at the Department of Archaeology of the Peter the Great Museum of  
 171 Anthropology and Ethnography (Kunstkamera) of the Russian Academy of Sciences, St. Petersburg, Russia  
 172 (hereinafter MAE-RAS), where the lithic assemblage has been curated since then <sup>11,12</sup>.

173 Pollen analysis performed at different Crimean sites, reveals a low-mountain forest–steppe environment. The  
 174 western area of the Crimean Mountain is characterized by plateau-like tops, covered by meadow steppe with a  
 175 prevalence of Poaceae and mesophytic herbs. The vegetation on the lower parts of the slopes has parallels with  
 176 Brînzani’s environment, otherwise for Surein I it is worth noting the occurrence of Fagaceae, well represented by  
 177 several species of oak (*Quercus pubescens*, *Q. petrae* and *Q. robur*). In our reference collection both starches and  
 178 fibers from other reported taxa in Crimean EUP sites are also present: hornbeam (*Carpinus orientalis*), maple  
 179 (*Acer campestre*), hazel (*Corylus avellana*), spindle-tree (*Euonymus europea*), dogwood (*Cornus mas* and *C.*  
 180 *sanguinea*), hawthorn (*Crataegus pentagyna*), and buckthorn (*Rhamnus cathartica*). <sup>2,11</sup>



181 **2.2.1 Surein I Object's biography.** In order to reconstruct the object biography of the unique grinding stone  
182 retrieved at Surein I (See Supplementary Fig. 1), it has to be stressed the outstanding modernity of Bonch-  
183 Osmolovski' methodological approach to excavation, encompassing cutting-edge techniques that he applied at  
184 both the sites of Surein I and Kiik-Koba, the latter yielding the first human remains of Neanderthals in Crimea  
185 presented to the world in 1925 with an article in Science News.<sup>13-17</sup>

186 Thanks to the vanguard excavation and conservation techniques pioneered at Surein I, the context including the  
187 grinding stone, associated with flint artifacts and faunal remains (horse bones, still in anatomical connection<sup>11,12</sup>,  
188 was transported intact to the museum where it has ever since been protected under a glass case. However, after  
189 more than 100 years it is impossible not to consider putative management operations that occurred to the grinding  
190 stone tool since when it entered the museum collections, although its uniqueness was recognized since its early  
191 emergence and thereafter, and it is widely known until present days<sup>18-20</sup>. Although it is not possible to control the  
192 several steps of the curation process that occurred across the nearly 100 years, the organized composition of  
193 contextual presence of artifacts (flint flakes and large GST) and animal bones, make it the oldest and best-preserved  
194 evidence of the intentional structuring of the living space by early *Homo sapiens*. Its conservation conditions,  
195 always protected by a glass case, made it an excellent candidate for investigating its active surface. The large  
196 grinding stone was accessed by the authors at the MAE-RAS storage facilities during the 2015 and 2016 sampling  
197 campaigns, under an overall research agreement between NTU, Singapore and MAE-RAS.

198 The grinding stone – a large pebble composed of biogenic limestone, 236 x 122 x 68 mm – belongs to layer 3, the  
199 lowermost level indisputably attributed to the Aurignacian<sup>18-21</sup>, that also yielded a molar tooth attributed to *Homo*  
200 *sapiens*<sup>11</sup>, at present unavailable in the collections). New AMS radiocarbon dating on horse bone collagen - Beta  
201 462734 carried out by the authors (2017, LL, unpublished data) is highly consistent with the reported oldest  
202 chronology.

203 The stone was analyzed in the storage room of the MAE RAS, St. Petersburg. Preliminary observation with  
204 Olympus BHMJ (metallographic microscope)<sup>5,6</sup> were at the base of the identification of the working surface, which  
205 bears evident flattened and smoothed areas. Several molds were collected from this surface and used for both use-  
206 wear traces and associated residue analysis. Afterwards, the stone was immersed in bi-distilled water placed into  
207 an ultrasonic bath, and the obtained solution was stored in 50 ml tubes after adding few drops of ethanol. The  
208 solution was then processed and analyzed in the Vladivostok lab (I.P.).<sup>5,6</sup> The molds were sonicated separately  
209 in a second time and processed in Paris since 2018.<sup>6</sup> Traceological analysis was performed directly on the GST  
210 (N.S. and V.T.) and on molds (L.L. and G.S.), using the 3D digital microscope Hirox KH-8700 available at the  
211 Cyprus Institute (Nicosia, Cyprus) and a SEM. The analysis highlighted the presence of large flattened areas,  
212 smoothed and polished asperities and several groups of long striations, all features that are visible in  
213 Supplementary Figure 3 and detailed in<sup>12</sup>.

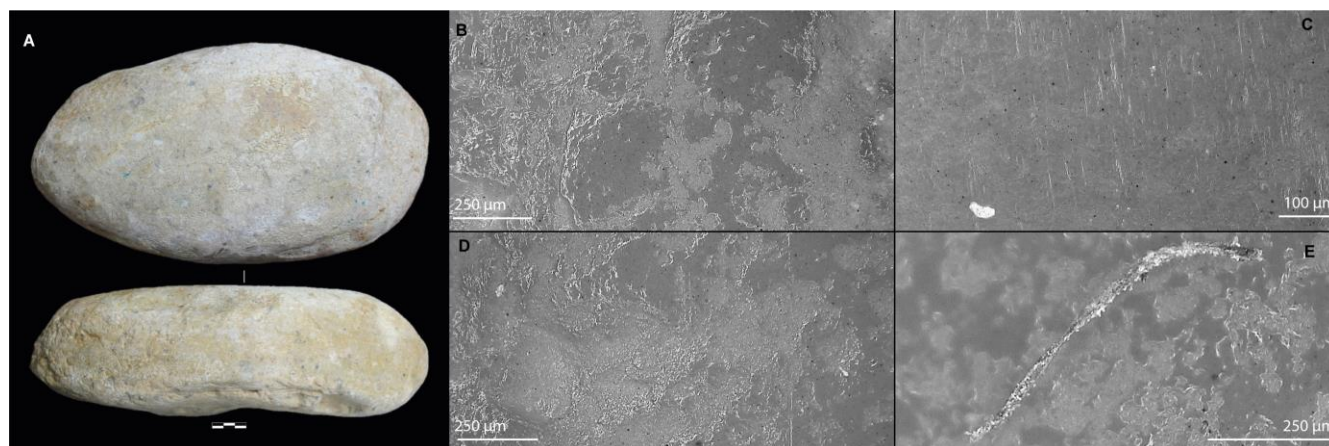

214

215 **Supplementary Fig. 3.** Surein I, biogenic limestone grinding stone (A), part of a structure recognized during the 1926-27  
216 excavation. The GST was found associated with horse mandibles, teeth and bones still in anatomical connection. The prompt  
217 recognition allowed the great care devoted to this exceptional find, creating ideal conditions for further studies. Use-wear  
218 traces observed on molds peeled-off from the active surfaces of the GSTs as observed with Hirox 8700, using mid-range zoom  
219 lens with large depth-of-field and long working distance. A selection of different features affecting the stones working surface:  
220 polish (B-D), E: residue (possibly a fiber on a polished area). Reference samples were taken from the inside of the glass-  
221 case covering the stone tool and from the original sediment still adhering to the horse bones sampled for the  
222 radiocarbon dating. These samples were processed according to the conventional workflow in two different labs  
223 (Vladivostok and Paris) and did not reveal exogenous starch grains<sup>5,6,10,12,21</sup>.

### 224 **2.3 Kostenki 14-Markina Gora**

225 The Kostenki 14-Markina Gora (K14) open air site represents the oldest evidence of the presence of *Homo sapiens*  
226 along the Don River, starting at least 36,000 years ago<sup>22</sup>. K14 is part of the rich Kostenki-Borschevo suite testifying  
227 to the intense inhabitation of the area for about 15,000 years<sup>23-25</sup>. Being one of the most intensively investigated  
228 sites of the EUP in the Western Eurasia, the relevance of its involvement in our study is twofold: on the one hand,  
229 the analysis of the SU-RBRs extracted from a selection of 9 ground stones – among a large assemblage of non-  
230 flaked industry recovered over the last fifty years – from Layers III and IV represents one of the oldest pieces of  
231 evidence of starchy plant processing enacted by *H. sapiens*. On the other hand, our data support that by applying  
232 an appropriate sampling and a sound analytical approach, even old museum collections – *legacy objects*<sup>9</sup> – can be  
233 worthwhile to investigate for veritable ancient starch candidates<sup>6</sup>.

234 Among the 9 GSTs under investigation, here we are presenting the pivotal results obtained from tool K14 #35  
235 retrieved in the upper part of layer III, which dates between 30.1- 31.8 ka. This layer leans immediately above the  
236 Campanian Ignimbrite layer, which is used to date the oldest presence of *H. sapiens* at K14 around 36 ka  
237 (Supplementary Fig.1). Pollen analysis reveals the presence of a grass-dominated (Poaceae) landscape with  
238 *Artemisia* and Chenopodiaceae accompanied by Polygonaceae, Cyperaceae, and Chicoriaceae. Birch and yernik  
239 replaced spruce, while few pollen also of *Alnaster* and *Salix* were found in<sup>24</sup>.

240 The surface of K14 #35 was preliminary observed with metallographic microscope at IHMC, RAS in St.  
241 Petersburg. The identified used areas were molded for wear traces analysis, performed with the 3D digital  
242 microscope (Hirox KH-8700) at the Cyprus Institute (Nicosia, Cyprus), and SEM at NTU Singapore. The analysis  
243 revealed the presence of flattened areas, polishing of the crystal surfaces, battering marks, and fractures. Crystals  
244 present sharp edges symptomatic of contact with a rigid medium (Supplementary Fig. 4) Moreover, during the  
245 scanning of the molds, starches (ASC-1) still adhering to the surface were noticed. In order to extract the granules,  
246 the peels were sonicated and the extracted pellets analyzed with the SEM (ASC-3).

247 One soil sample associated with the relevant archaeological context was analyzed. Three starch grains were  
248 recovered from this particular control sample. Moreover, two samples of the volcanic ashes attributed to CY5 were  
249 analyzed, revealing the absence of starches confirming the absence of pollens already observed by Velichko et  
250 al.<sup>24</sup>

252 ***Kostenki 14-Markina Gora Object's biography.*** The SR-FTIR analysis was carried out on a small grinding stone  
253 – K14 Layer III L 33 214-225 #35 – made of fine-grained quartzite, a raw material available in the ravines nearby  
254 the site. Interestingly for our research is the fact that since 1984, Melekestsev and colleagues<sup>26</sup> recognized the ash  
255 layers as the result of the catastrophic eruption of the Campi Flegrei (CY5) and therefore the oldest sediments of  
256 Kostenki 14 yielding the burial were split in layers III and IVb<sup>22,23</sup>. Our sampling focused on a selection of 9  
257 ground stones from both the layers. A selection of the Upper Paleolithic ground stone collections, widely known  
258 among the Russian prehistoric community since almost all the stones are already described or mentioned in the



259 Russian literature, is reviewed in a recent paper in English<sup>27</sup>. Therefore, it must be said that the handling and  
260 management of the Kostenki-Borshevo stone tools can be considered quite random and promiscuous and we  
261 acknowledged that biogenic residues we observed should be considered critically.

262 Kostenki 14 is considered a temperate steppe site where horse, mammoth and bison herds roamed and were hunted  
263 by early groups of modern humans around 36 ka ago. The pebbles retrieved at the site underwent xerophytic steppe  
264 conditions since their burial<sup>28,29</sup>. This environment is named *yedoma*, a cold, organic-rich permafrost dating to the  
265 Pleistocene. The longstanding cold to freezing conditions during the excavation, along with their subsequent  
266 curation in museum dark store-rooms – of the State Archaeological Museum-Reserve in Voronezh<sup>25,30</sup>. These  
267 situations (low temperatures and dark rooms) created the condition to “buy time”<sup>9</sup> in favor of the conservation of  
268 biogenic residues. The cobbles from the Kostenki-Borshevo suite are usually deposited in the storage infrastructure  
269 designed by Rogachev since the early seventies<sup>25</sup>, although we accessed the ground stone tools at the IHMC-RAS  
270 in St. Petersburg (2015 and 2016) where the GSTs were loaded in wooden boxes and bagged separately, hence  
271 preserved from dust.

272

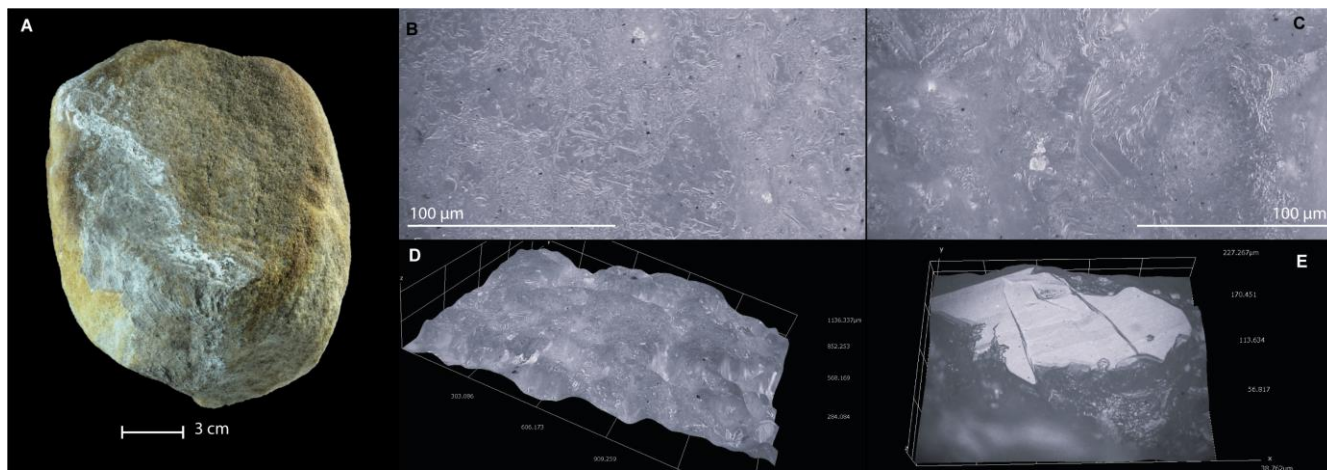

273 **Supplementary Fig. 4.** Kostenki 14, L 33 214-225 #35 retrieved in Layer III. B: aligned polish, C: tip of the crystals damaged  
274 by rounding and polishing, D: the same area as seen in 3D showing the microtexture roughness; E: 3D well developed polish.  
275 All the images were taken with an Hirox 8700, using mid-range zoom lens with large depth-of-field and long working distance.

276  
277

### 3. Sample Preparation

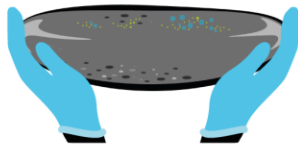

Bleaching and covering the surfaces of the desks for the selection of the putative ground stones; all the lab tools have been bleached before use and bagged separately; the items are handled with powder-free gloves

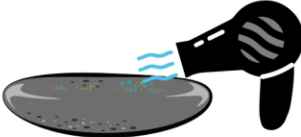

Dusting the surface

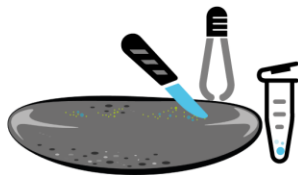

Scrubbing of the larger soil particles still adhering to the stones and collecting it for cross-check reference

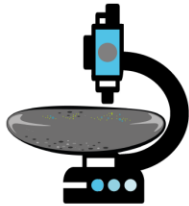

Observation of the surface with a stereomicroscope to identify the putative used area(s)

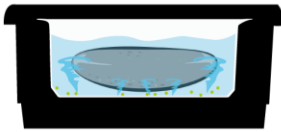

Sonication of the selected areas of the ground stones

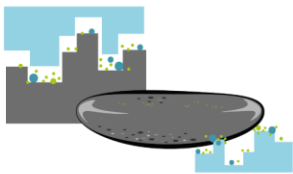

Peeling with polyvinyl siloxane (Provil L) removing the particles strongly bounded to the surface. Up to 3 molds from the same areas: the last as the cleanest copy to carry out high magnification wear-traces analysis

278  
279  
280  
281  
282  
283  
284  
285  
286  
287  
288

**Supplementary Fig. 5.** A graphic representation of the U-RBR extraction pipeline.

289  
290

#### 4. Spectra subtraction

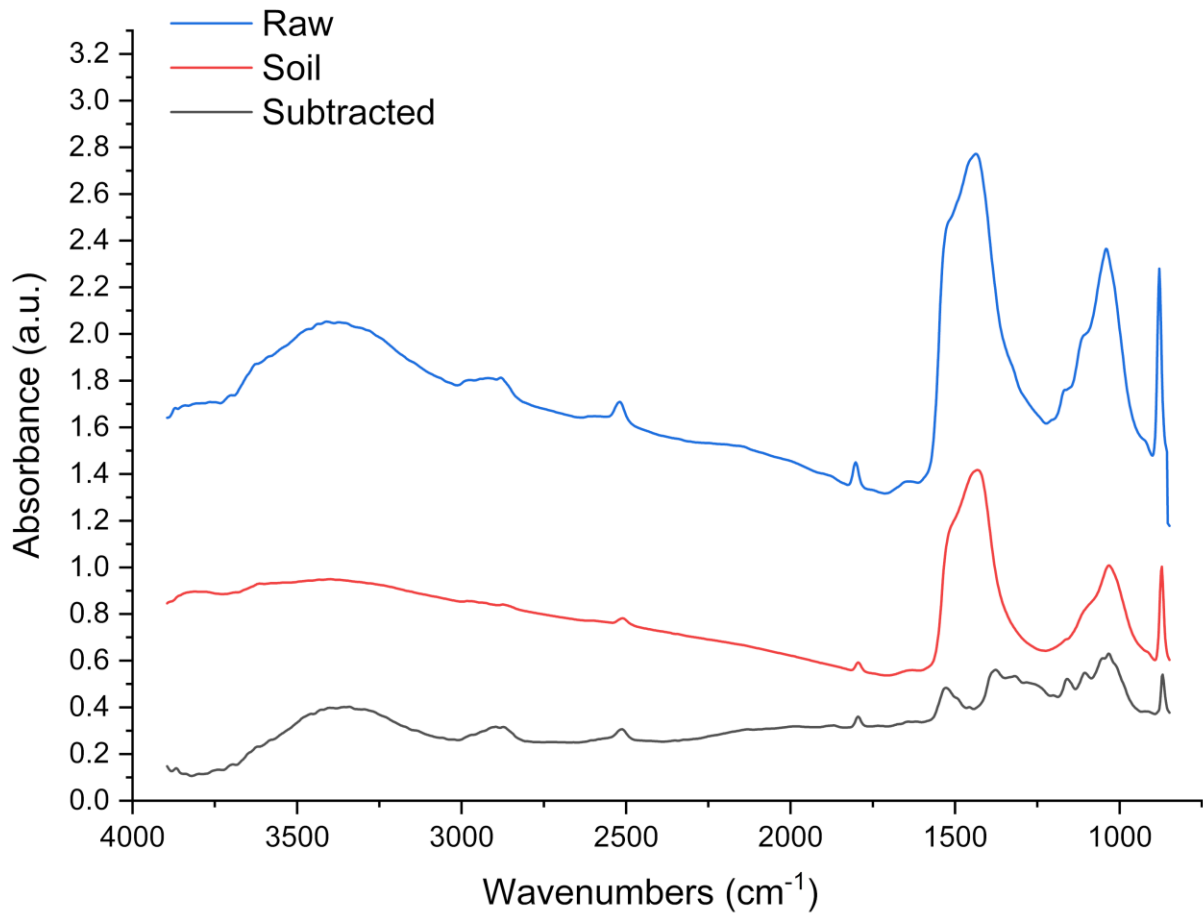

291

292 **Supplementary Fig. 6.** An example of the procedure for the subtraction of the contribution of the material  
293 surrounding ASC-2 particles is shown in the present figure. The average spectrum of the material surrounding the  
294 identified ASC-2 (red line) was subtracted from the raw spectrum of ASC-2 (blue line) applying a multiplicative  
295 coefficient estimated for minimizing the soil carbonate band, peaked at ~1410 cm<sup>-1</sup>. The resulting spectrum,  
296 representing the closest approximation to clean ASC spectrum, is shown by the black line.

297

#### 298 References and Notes

299

- 300 1. Demidenko, Y. Demidenko 2014 - The Great North Black Sea region Early UP and human migrations into  
301 the region from different territories IN ERAUL 140 + ArcheoLogiques 5, Liege.
- 302 2. Gerasimenko, N. Environmental changes in the Crimean mountains during the Last Interglacial–middle  
303 pleniglacial as recorded by pollen and lithopedology. *Quaternary International* **164–165**, 207–220 (2007).
- 304 3. Hardy, B. L. Climatic variability and plant food distribution in Pleistocene Europe: Implications for  
305 Neanderthal diet and subsistence. *Quaternary Science Reviews* **29**, 662–679 (2010).
- 306 4. *Periglacial Landscapes of Europe*. (Springer International Publishing, 2022). doi:10.1007/978-3-031-14895-  
307 8.
- 308 5. Longo, L. *et al.* A Multi-Dimensional Approach to Investigate Use-Related Biogenic Residues on Palaeolithic  
309 Ground Stone Tools. *Environmental Archaeology* (2021) doi:10.1080/14614103.2021.1975252.

- 310 6. Longo, L. *et al.* Coupling the beams: How controlled extraction methods and FTIR-spectroscopy, OM and  
311 SEM reveal the grinding of starchy plants in the Pontic steppe 36,000 years ago. *Journal of Archaeological*  
312 *Science: Reports* **41**, (2022).
- 313 7. Allsworth-Jones, P., Borziac, I. A., Chetraru, N. A., French, C. a. I. & Medyanik, S. I. Brînzeni: A  
314 Multidisciplinary Study of an Upper Palaeolithic site in Moldova. *Proceedings of the Prehistoric Society* **84**,  
315 41–76 (2018).
- 316 8. Sorrentino, G. *et al.* Tracing Old Gestures: A Multiscale Analysis of Ground Stone Tools Developed on  
317 Sequential Lab-Controlled Replicative Experiments. *Heritage* **6**, 4737–4767 (2023).
- 318 9. Koh, A. J. & Birney, K. J. Ancient Organic Residues as Cultural and Environmental Proxies: The Value of  
319 Legacy Objects. *Sustainability* **11**, 656 (2019).
- 320 10. Natalia Skakun *et al.* Grinding Stones and Pestles from the Szeletian Layer of Brînzeni-1 Grotto  
321 (Republic of Moldova) (in the Light of Experimental and Traceological Study, Data of Organic Remains  
322 Analysis and 3D Scanning). *Eminak* **0**, (2020).
- 323 11. Vekilova, E. A. Surein I and its place among the Paleolithic sites of Crimea and the next territories.  
324 *Materials and Research in the Archaeology of the USSR (Materialy i Issledovaniya po Arkheologii SSSR)* **59**,  
325 235–323 (1957).
- 326 12. Longo, L., Skakun, N. N., Pantyukhina, I. E., Terekhina, V. V. & Sorrentino, G. Aurignacian grinding  
327 stone from Surein I (Crimea): “trace-ing” the roots of starch-based diet. *Journal of Archaeological Science:*  
328 *Reports* **38**, 102999 (2021).
- 329 13. Crimean Neanderthal Remains. *Science* **61**, (1925).
- 330 14. Bonch-Osmolovsky, G.A. Paleoliticheskaya stoyanka v Krymu. Predvaritel’noye soobshcheniye  
331 [Paleolithic site in the Crimea. Preliminary Report]. *Rossiyskiy antropologicheskiy zhurnal [Russian Journal*  
332 *of Anthropology]* 81–87 (1926).
- 333 15. Bonch-Osmolovsky, G.A. Le paléolithique de Crimée. Akademia NAUK SSSR, Leningrad. *Separate*  
334 *impression of Bulletin of the Commission for the study of the Quaternary period I* (1929).
- 335 16. Bonch-Osmolovsky, G.A. The study of the Crimean caves in 1932. *PIMC* **9–10**, 56–57 (1932) (in  
336 Russian).
- 337 17. Bonch-Osmolovsky, G.A. Itogi izucheniya krimskogo paleolita [The results of studies of the Crimean  
338 Palaeolithic]. In: Trudi II Mezhdunarodnoi konferenzii, Sovetskakya sekziya po isucheniu chetvertichnogo  
339 perioda v Evrope 5 [Proceedings of the international conference of the Association for the study of the  
340 Quaternary period in Europe. Soviet section] 5, 124–130 (in Russian). *Trudi II Mezhdunarodnoi konferenzii,*  
341 *Sovetskakya sekziya po isucheniu chetvertichnogo perioda v Evrope 5 [Proceedings of the international*  
342 *conference of the Association for the study of the Quaternary period in Europe. Soviet section]* 124–130  
343 (1934).
- 344 18. Bataille, G., Tafelmaier, Y. & Weniger, G. C. Living on the edge – A comparative approach for studying  
345 the beginning of the Aurignacian. *Quaternary International* **474**, 3–29 (2018).
- 346 19. Bataille, G. Extracting the ‘Proto’ from the Aurignacian. Distinct Production Sequences of Blades and  
347 Bladelets in the Lower Aurignacian Phase of Siuren I, Units H and G (Crimea). *Mitteilungen der Gesellschaft*  
348 *für Urgeschichte* **25**, 49–86 (2016).
- 349 20. Zwyns, N. Small laminar blanks at Siuren I Rockshelter: Technological and comparative approach. in  
350 359–373 (2012).
- 351 21. Skakun, N. *et al.* Results of the integrated study of a large stone tool from the Upper Paleolithic site  
352 Suren I. *Camera Praehistorica* 8–24 (2021) doi:10.31250/2658-3828-2021-1-8-24.
- 353 22. Dinnis, R. *et al.* New data for the Early Upper Paleolithic of Kostenki (Russia). *Journal of Human*  
354 *Evolution* **127**, 21–40 (2019).
- 355 23. Sinitsyn, A. A. & Hoffecker, J. F. Radiocarbon dating and chronology of the Early Upper Paleolithic at  
356 Kostenki. *Quaternary International* **152–153**, 164–174 (2006).
- 357 24. Velichko, A. A., Pisareva, V. V., Sedov, S. N., Sinitsyn, A. A. & Timireva, S. N. Paleogeography of  
358 Kostenki-14 (Marinka Gora). *Archaeology, Ethnology and Anthropology of Eurasia* **37**, 35–50 (2009).
- 359 25. Rogachev, A.N. *On the complex gathering as a form of economy in Palaeolithic epoch on the Russian*  
360 *plain.* (Lebedinskaya, G.V., Rabinovich, M.G. (Eds.), 1973).

- 361 26. Melekestsev, I. V, Kir'ianov, N. D & Praslov, N.D. Katastroficheskoe izverzhenie v rajone Flegrejskukh  
362 polej (Italiya). *Vulkanologiya i seismologiya* 34–35 (1984).
- 363 27. Stepanova, K. Upper Palaeolithic grinding stones from Eastern European sites: An overview.  
364 *Quaternary International* **541**, 162–181 (2020).
- 365 28. Rogachev, A.N & Sinitsyn, A.A. Kostenki 14. in *Paleolit Kostenkovsko-Borshchevskogo raiona na*  
366 *Donu 1879–1979* 145–162 (1982).
- 367 29. Spiridonova E.A. Palinologicheskoye obosnovaniye vozrasta otlozhenii stratigraficheskoi kolonki  
368 stoyanki Kostenki-14 (Markina gora). In *Osobennosti razvitiya verkhnego paleolita Vostochnoi Evropy. St.*  
369 *Petersburg.: Izd. IIMK* 237–246 (2002).
- 370 30. The State Archeological Museum-Reserve Kostenki. <http://www.russianmuseums.info/M655>.  
371
